# Supplementary material for: Effectiveness Associated With Vaccination After COVID-19 Recovery in Preventing Reinfection
Source: PubMed Central journal article supplement (PMC9331088; doi:10.1001/jamanetworkopen.2022.23917), 2022-07-27
Supplement: jamanetwopen-e2223917-s001.pdf [file jamanetwopen-e2223917-s001.pdf]

## Supplemental Online Content

Lewis N, Chambers LC, Chu HT, et al. Effectiveness associated with vaccination after COVID-19 recovery in preventing reinfection. *JAMA Netw Open*. 2022;5(7):e2223917. doi:10.1001/jamanetworkopen.2022.23917

**eTable 1.** Cumulative Probability of COVID-19 Reinfection, by Subpopulation and Vaccination Status

**eTable 2.** Incidence Rate of COVID-19 Reinfection and Reinfection-Associated Hospitalization and Death, After Recovery From Prior COVID-19, by Subpopulation and Vaccination Status

**eTable 3.** Hazard of Reinfection From Proportional Hazard Regression Models Fit to Data From Each Subpopulation

**eFigure.** Partial Association Plots for Age and Cohort Entry Time Interactions Estimated Using Spline Terms in Cox Regression, by Subpopulation

**eAppendix.** Description of Sensitivity Analyses

**eTable 4.** Sensitivity Analysis: Time Between Vaccine Doses in a 2-Dose Series Limited to a Maximum of 42 Days

**eTable 5.** Sensitivity Analysis: Restrict Analysis Individuals Who Entered the Risk Cohort After Vaccine Rollout Only

**eTable 6.** Characteristics of Patients Removed From First Sensitivity Analysis that Excludes Individuals With More Than 42 Days Between First and Second Dose of Either mRNA Vaccine

**eTable 7.** Characteristics of Individuals Removed From Second Sensitivity Analysis Excluding Those Whose First Infection Occurred Prior to Vaccine Rollout

**eTable 8.** Vaccine Effectiveness Associated With Protection Against COVID-19 Reinfection by Subpopulation, Stratified by Vaccine Type, Estimated Using a Cox Proportional Hazards Regression

This supplemental material has been provided by the authors to give readers additional information about their work.

**eTable 1.****Cumulative Probability of COVID-19 Reinfection, by Subpopulation and Vaccination Status**

|                                 | <b>3 Months</b>   | <b>6 Months</b>      | <b>9 Months</b>      |
|---------------------------------|-------------------|----------------------|----------------------|
| General population (N = 94,516) |                   |                      |                      |
| Unvaccinated                    | 0.6% (0.5%, 0.6%) | 1.2% (1.1%, 1.3%)    | 1.9% (1.8%, 2.0%)    |
| CPVS                            | 0.2% (0.1%, 0.2%) | 0.5% (0.4%, 0.6%)    | 1.0% (0.8%, 1.1%)    |
| LTCC employees (N=2,877)        |                   |                      |                      |
| Unvaccinated                    | 4.0% (3.3%, 4.8%) | 8.8% (7.6%, 9.9%)    | 10.0% (8.8%, 11.5%)  |
| CPVS                            | 0.9% (0.5%, 1.4%) | 1.3% (0.8%, 1.9%)    | 2.5% (1.6%, 3.4%)    |
| LTCC residents (N = 3,124)      |                   |                      |                      |
| Unvaccinated                    | 4.8% (4.0%, 5.6%) | 12.0% (10.0%, 13.0%) | 13.0% (12.0%, 14.0%) |
| CPVS                            | 1.2% (0.7%, 1.7%) | 1.6% (1.0%, 2.2%)    | 2.0% (1.3%, 2.7%)    |

Abbreviations: CI, confidence interval; COVID-19, Coronavirus Disease 2019; LTCC, long-term congregate care. CPVS, Completed Primary Vaccination Series.

**eTable 2.**

Incidence Rate of COVID-19 Reinfection and Reinfection-Associated Hospitalization and Death, After Recovery From Prior COVID-19, by Subpopulation and Vaccination Status

|                       | Person time<br>(100,000 Days) | Sample size,<br>number of<br>reinfections /<br>hospitalizations /<br>deaths <sup>b</sup> | Reinfections<br>per 100,000<br>person days<br>(95% CI) <sup>a</sup> | Hospitalizations<br>per 100,000<br>person days<br>(95% CI) <sup>a</sup> | Deaths<br>per 100,000<br>person days<br>(95% CI) <sup>a</sup> |
|-----------------------|-------------------------------|------------------------------------------------------------------------------------------|---------------------------------------------------------------------|-------------------------------------------------------------------------|---------------------------------------------------------------|
| General<br>population |                               | N = 94,516                                                                               |                                                                     |                                                                         |                                                               |
| Unvaccinated          | 159.8                         | 1,105 / 76 / 5                                                                           | 6.9 (6.5, 7.4)                                                      | 0.5 (0.1, 0.4)                                                          | 0.03 (0.01, 0.07)                                             |
| Partial CPVS          | 16.0                          | 55 / 5 / 0                                                                               | 3.4 (2.6, 4.5)                                                      | 0.3 (0.1, 0.7)                                                          | 0                                                             |
| CPVS                  | 83.5                          | 243 / 19 / <5                                                                            | 2.9 (2.6, 3.3)                                                      | 0.2 (0.1, 0.4)                                                          | N/A <sup>b</sup>                                              |
| LTCC<br>employees     |                               | N = 2,877                                                                                |                                                                     |                                                                         |                                                               |
| Unvaccinated          | 5.7                           | 227 / 7 / 0                                                                              | 40.2 (35.1, 45.7)                                                   | 1.2 (0.5, 2.6)                                                          | 0                                                             |
| Partial CPVS          | 0.8                           | 11 / 0 / 0                                                                               | 13.2 (6.6, 23.7)                                                    | 0                                                                       | 0                                                             |
| CPVS                  | 3.5                           | 36 / 0 / 0                                                                               | 10.2 (7.1, 14.1)                                                    | 0                                                                       | 0                                                             |
| LTCC residents        |                               | N = 3,124                                                                                |                                                                     |                                                                         |                                                               |
| Unvaccinated          | 6.3                           | 314 / 36 / 12                                                                            | 50.3 (44.8, 56.1)                                                   | 5.8 (4.0, 8.0)                                                          | 1.9 (1.0, 3.4)                                                |
| Partial CPVS          | 1.0                           | 25 / <5 / 0                                                                              | 24.0 (15.5, 35.3)                                                   | N/A <sup>b</sup>                                                        | 0                                                             |
| CPVS                  | 4.9                           | 41 / 5 / <5                                                                              | 8.4 (6.1, 11.5)                                                     | 1.0 (0.3, 2.4)                                                          | N/A <sup>b</sup>                                              |

Abbreviations: CI, confidence interval; COVID-19, Coronavirus Disease 2019; LTCC, long-term congregate care. CPVS, Completed Primary Vaccination Series; N/A, not available.

<sup>a</sup> 95% confidence intervals were calculated using a Poisson test.

<sup>b</sup> Counts between 1 and 4, and calculations based on those counts, are suppressed in accordance with RIDOH's Small Numbers Policy.

**eTable 3.**

Hazard of Reinfection From Proportional Hazard Regression Models Fit to Data From Each Subpopulation

| Covariate                                          | General population<br>N=94,516<br>(95% CI) | LTCC<br>employees<br>N=2,877<br>(95% CI) | LTCC<br>residents<br>N=3,124<br>(95% CI) |
|----------------------------------------------------|--------------------------------------------|------------------------------------------|------------------------------------------|
| Vaccination status                                 |                                            |                                          |                                          |
| Unvaccinated                                       | Ref.                                       | Ref.                                     | Ref.                                     |
| Partial CPVS                                       | 0.48 (0.37, 0.64)                          | 0.45 (0.23, 0.89)                        | 0.67 (0.43, 1.05)                        |
| CPVS                                               | 0.38 (0.33, 0.44)                          | 0.51 (0.34, 0.77)                        | 0.51 (0.35, 0.74)                        |
| Sex                                                |                                            |                                          |                                          |
| Female                                             | Ref.                                       | Ref.                                     | Ref.                                     |
| Male                                               | 0.74 (0.67, 0.83)                          | 1.17 (0.85, 1.62)                        | 0.85 (0.65, 1.13)                        |
| Unknown                                            | 0.20 (0.13, 0.29)                          | 0.11 (0.05, 0.23)                        | 0.76 (0.55, 1.05)                        |
| Race/ethnicity                                     |                                            |                                          |                                          |
| White <sup>a</sup>                                 | Ref.                                       | Ref.                                     | Ref.                                     |
| Hispanic or Latino (any race)                      | 0.81 (0.70, 0.95)                          | 1.06 (0.74, 1.53)                        | 0.89 (0.47, 1.70)                        |
| Asiana                                             | 0.47 (0.28, 0.79)                          | 0.71 (0.29, 1.77)                        | 1.64 (0.40, 6.64)                        |
| Black or African Americana                         | 0.92 (0.74, 1.15)                          | 0.88 (0.62, 1.25)                        | 0.90 (0.45, 1.80)                        |
| Other or unknown race <sup>a</sup>                 | 0.57 (0.46, 0.70)                          | 0.51 (0.30, 0.86)                        | 0.66 (0.52, 0.83)                        |
| Community COVID-19 risk <sup>b</sup>               |                                            |                                          |                                          |
| High                                               | Ref.                                       | Ref.                                     | Ref.                                     |
| Moderate                                           | 1.13 (0.97, 1.32)                          | 1.08 (0.80, 1.47)                        | 1.18 (0.89, 1.55)                        |
| Low                                                | 1.11 (0.95, 1.30)                          | 1.00 (0.71, 1.42)                        | 1.16 (0.89, 1.52)                        |
| Unknown                                            | 0.29 (0.07, 1.17)                          | 0.76 (0.27, 2.12)                        | 0.43 (0.19, 0.98)                        |
| Symptom status during first infection <sup>c</sup> |                                            |                                          |                                          |
| Asymptomatic                                       | Ref.                                       | Ref.                                     | Ref.                                     |
| Symptomatic                                        | 0.58 (0.51, 0.66)                          | 0.76 (0.58, 0.99)                        | 1.28 (0.81, 2.02)                        |
| Unknown                                            | 0.77 (0.65, 0.93)                          | 1.47 (0.98, 2.21)                        | 1.12 (0.75, 1.67)                        |
| Hospitalization during first infection             |                                            |                                          |                                          |
| Not hospitalized                                   | Ref.                                       | Ref.                                     | Ref.                                     |
| Hospitalized                                       | 1.91 (1.56, 2.33)                          | 0.99 (0.44, 2.22)                        | 0.91 (0.65, 1.28)                        |

Abbreviations: CI, Confidence Interval; COVID-19, Coronavirus Disease 2019; RIDOH, Rhode Island Department of Health; CPVS, Completion of Primary Vaccination Series.

<sup>a</sup> Patient reported non-Hispanic or unknown ethnicity.

<sup>b</sup> Summary of symptom information reported to RIDOH as the reason for testing, during case investigation, and/or through symptom self-monitoring.

<sup>c</sup> ZIP-code-based community risk classification created by RIDOH based on community characteristics such as population density, sociodemographics, and COVID-19 burden to help guide COVID-19 surveillance and response efforts.

**eFigure.**

Partial Association Plots for Age and Cohort Entry Time Interactions Estimated Using Spline Terms in Cox Regression, by Subpopulation

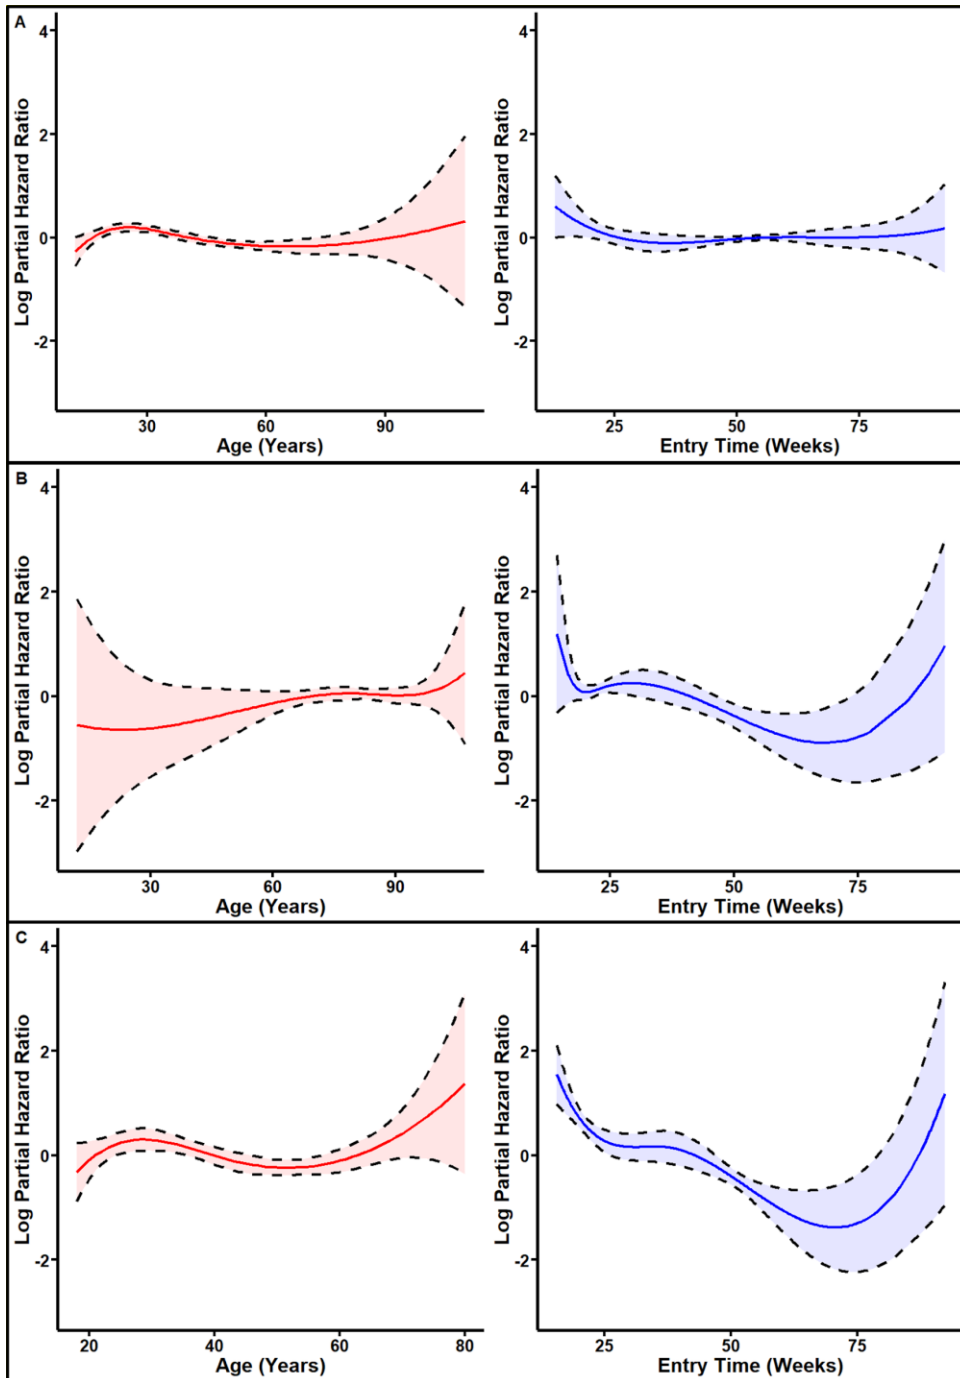

Abbreviations: LTCC, long-term congregate care; CPVS, Completion of Primary Vaccination Series.

## **eAppendix.** Description of Sensitivity Analyses

We conducted two sensitivity analyses. The first assesses sensitivity to our definition of completion of primary vaccination series for vaccines requiring two doses; the second examines the impact of including data during a period where vaccines were not available.

The first sensitivity analysis is motivated by the idea that, for the two-dose regimens, a person whose second dose is administered after a long delay has potentially lost a significant amount of vaccine-conferred immunity. This could result in downward bias of the vaccine effect. Therefore, we removed any people who completed the primary vaccination series but received their second dose at least 42 days after their first dose. This resulted in the removal of 1,273 people. After pruning the data, the analysis followed the same schematic as described in the paper. The results are shown in eTable 4 and are consistent with the results of the primary analysis (Table 2 in the manuscript).

The second sensitivity analysis addresses the possibility that the estimated effect of vaccination might be affected because vaccines were not available prior to December 2020 (i.e. during that time, there were no individuals at risk for infection who also were vaccinated). If the background risk of infection is systematically different during that period, the vaccine effect could be biased. For example, if background infection risk is higher prior to December 2020, our reported vaccine effect could be biased upward. To address this, we restricted the observation period to run from December 14, 2020, to December 9, 2021. This resulted in the removal of 404 people. The analysis of this subset is reported in eTable 5 and are consistent with the results of the primary analysis reported in Table 2 in the manuscript.

eTables 6 and 7 summarize the characteristics of those removed from main sample to construct the datasets used in the sensitivity analyses.

**eTable 4.**

Sensitivity Analysis: Time Between Vaccine Doses in a 2-Dose Series Limited to a Maximum of 42 Days

|                    | <b>Vaccine effectiveness<br/>(95% CI)</b> |
|--------------------|-------------------------------------------|
| General population |                                           |
| Partial CPVS       | 56% (41%, 68%)                            |
| CPVS               | 62% (56%, 67%)                            |
| LTCC employees     |                                           |
| Partial CPVS       | 51% (3%, 75%)                             |
| CPVS               | 47% (19%, 65%)                            |
| LTCC residents     |                                           |
| Partial CPVS       | 39% (0%, 63%)                             |
| CPVS               | 47% (23%, 64%)                            |

Abbreviations: CI, confidence interval; COVID-19, Coronavirus Disease 2019; CPVS, completed primary vaccination series; LTCC, long-term congregate care.

**eTable 5.****Sensitivity Analysis: Restrict Analysis Individuals Who Entered the Risk Cohort After Vaccine Rollout Only**

|                    | <b>Vaccine effectiveness<br/>(95% CI)</b> |
|--------------------|-------------------------------------------|
| General population |                                           |
| Partial CPVS       | 49% (33%, 61%)                            |
| CPVS               | 64% (58%, 69%)                            |
| LTCC employees     |                                           |
| Partial CPVS       | 50% (0%, 75%)                             |
| CPVS               | 49% (23%, 67%)                            |
| LTCC residents     |                                           |
| Partial CPVS       | 18% (-29%, 48%)                           |
| CPVS               | 45% (19%, 63%)                            |

Abbreviations: CI, confidence interval; COVID-19, Coronavirus Disease 2019; CPVS, completed primary vaccination series; LTCC, long-term congregate care.



**eTable 6.**

Characteristics of Patients Removed From First Sensitivity Analysis that Excludes Individuals With More Than 42 Days Between First and Second Dose of Either mRNA Vaccine

| Characteristic                                     | General population<br>N=1,104<br>n (%) | LTCC employees<br>N=86<br>n (%) | LTCC residents<br>N=83<br>n (%) |
|----------------------------------------------------|----------------------------------------|---------------------------------|---------------------------------|
| Age (years), median (IQR)                          | 35 (23-51)                             | 42 (32-52)                      | 77 (68-86)                      |
| Sex assigned at birth                              |                                        |                                 |                                 |
| Female                                             | 544 (49.3)                             | 70 (81.4)                       | 46 (55.4)                       |
| Male                                               | 487 (44.1)                             | 9 (10.5)                        | 19 (22.9)                       |
| Unknown                                            | 73 (6.6)                               | 7 (8.1)                         | 18 (21.7)                       |
| Race/ethnicity                                     |                                        |                                 |                                 |
| Hispanic or Latino (any race)                      | 477 (43.2)                             | 32 (37.2)                       | 27 (32.5)                       |
| Black or African American <sup>a</sup>             | 387 (35.1)                             | 18 (20.9)                       | 2 (2.4)                         |
| White <sup>a</sup>                                 | 21 (1.9)                               | 1 (1.2)                         | 0 (0.0)                         |
| Asian <sup>a</sup>                                 | 74 (6.7)                               | 23 (26.7)                       | 3 (3.6)                         |
| Other or unknown race <sup>a</sup>                 | 145 (13.1)                             | 12 (14.0)                       | 51 (61.4)                       |
| Symptom status during first infection <sup>b</sup> |                                        |                                 |                                 |
| Asymptomatic                                       | 131 (11.9)                             | 27 (31.4)                       | 2 (2.4)                         |
| Symptomatic                                        | 810 (73.4)                             | 55 (64.0)                       | 17 (20.5)                       |
| Unknown                                            | 163 (14.8)                             | 4 (4.7)                         | 64 (77.1)                       |
| Community COVID-19 risk <sup>c</sup>               |                                        |                                 |                                 |
| High                                               | 453 (41.0)                             | 31 (36.0)                       | 21 (25.3)                       |
| Moderate                                           | 222 (20.1)                             | 28 (32.6)                       | 21 (25.3)                       |
| Low                                                | 427 (38.7)                             | 27 (31.4)                       | 37 (44.6)                       |
| Unknown                                            | 2 (0.2)                                | 0 (0.0)                         | 4 (4.8)                         |
| Vaccination status at end of follow-up             |                                        |                                 |                                 |
| CPVS                                               | 1,079 (97.7)                           | 75 (87.2)                       | 65 (78.3)                       |
| Partial CPVS                                       | 8 (0.7)                                | 0 (0.0)                         | 4 (4.8)                         |
| Unvaccinated                                       | 17 (1.5)                               | 11 (12.8)                       | 14 (16.9)                       |
| First vaccine type received                        |                                        |                                 |                                 |
| Moderna                                            | 491 (44.5)                             | 16 (18.6)                       | 12 (14.5)                       |
| Pfizer                                             | 596 (54.0)                             | 59 (68.6)                       | 57 (68.7)                       |

|                                                                      |                |               |               |
|----------------------------------------------------------------------|----------------|---------------|---------------|
| Janssen                                                              | 0 (0.0)        | 0 (0.0)       | 0 (0.0)       |
| Unvaccinated                                                         | 17 (1.5)       | 11 (12.8)     | 14 (16.9)     |
| Hospitalization status at first infection                            |                |               |               |
| Not hospitalized                                                     | 1,030 (93.3)   | 81 (94.2)     | 73 (88.0)     |
| Hospitalized                                                         | 74 (6.7)       | 5 (5.8)       | 10 (12.0)     |
| First infection period <sup>d</sup>                                  |                |               |               |
| Infected during wild type period                                     | 1,042 (94.4)   | 85 (98.8)     | 83 (100.0)    |
| Infected during Alpha period                                         | 62 (5.6)       | 1 (1.2)       | 0 (0.0)       |
| Infected during Delta period                                         | 0 (0.0)        | 0 (0.0)       | 0 (0.0)       |
| Reinfection status at end of follow-up <sup>d</sup>                  |                |               |               |
| Not reinfected                                                       | 1,077 (97.6)   | 75 (87.2)     | 65 (78.3)     |
| Reinfected during wild type period                                   | 8 (0.7)        | 10 (11.6)     | 15 (18.1)     |
| Reinfected during Alpha period                                       | 11 (1.0)       | 1 (1.2)       | 2 (2.4)       |
| Reinfected during Delta period                                       | 8 (0.7)        | 0 (0.0)       | 1 (1.2)       |
| Months between infections among reinfected individuals, median (IQR) | 7.9 (4.8-10.7) | 6.9 (4.8-8.7) | 7.1 (4.2-8.6) |

Abbreviations: COVID-19, Coronavirus Disease 2019; RIDOH, Rhode Island Department of Health; IQR, Interquartile Range; CPVS, Completion of Primary Vaccination Series.

<sup>a</sup> Patient reported non-Hispanic or unknown ethnicity.

<sup>b</sup> Summary of symptom information reported to RIDOH as the reason for testing, during case investigation, and/or through symptom self-monitoring.

<sup>c</sup> ZIP-code-based community risk classification created by RIDOH based on community characteristics such as population density, sociodemographics, and COVID-19 burden to help guide COVID-19 surveillance and response efforts.

<sup>d</sup> Predominant COVID-19 strains defined as follows: wild type strain - 2/28/2020-03/16/2021, Alpha strain - 03/17/2021-07/03/2021, and Delta strain – 07/04/2021-12/9/2021.

**eTable 7.**

Characteristics of Individuals Removed From Second Sensitivity Analysis Excluding Those Whose First Infection Occurred Prior to Vaccine Rollout

| Characteristic                                                       | General population<br>N=145<br>n (%) | LTCC employees<br>N=106<br>n (%) | LTCC residents<br>N=153<br>n (%) |
|----------------------------------------------------------------------|--------------------------------------|----------------------------------|----------------------------------|
| Age (years), median (IQR)                                            | 42 (28-59)                           | 44 (32-57)                       | 81 (73-90)                       |
| Sex assigned at birth                                                |                                      |                                  |                                  |
| Female                                                               | 81 (55.9)                            | 82 (77.4)                        | 79 (51.6)                        |
| Male                                                                 | 57 (39.3)                            | 19 (17.9)                        | 33 (21.6)                        |
| Unknown                                                              | 7 (4.8)                              | 5 (4.7)                          | 41 (26.8)                        |
| Race/ethnicity                                                       |                                      |                                  |                                  |
| Hispanic or Latino (any race)                                        | 44 (30.3)                            | 48 (45.3)                        | 65 (42.5)                        |
| Black or African American <sup>a</sup>                               | 71 (49.0)                            | 20 (18.9)                        | 3 (2.0)                          |
| White <sup>a</sup>                                                   | 3 (2.1)                              | 1 (0.9)                          | 0 (0.0)                          |
| Asian <sup>a</sup>                                                   | 17 (11.7)                            | 31 (29.2)                        | 1 (0.7)                          |
| Other or unknown race <sup>a</sup>                                   | 10 (6.9)                             | 6 (5.7)                          | 84 (54.9)                        |
| Symptom status during first infection <sup>b</sup>                   |                                      |                                  |                                  |
| Asymptomatic                                                         | 39 (26.9)                            | 40 (37.7)                        | 8 (5.2)                          |
| Symptomatic                                                          | 81 (55.9)                            | 55 (51.9)                        | 38 (24.8)                        |
| Unknown                                                              | 25 (17.2)                            | 11 (10.4)                        | 107 (69.9)                       |
| Community COVID-19 risk <sup>c</sup>                                 |                                      |                                  |                                  |
| High                                                                 | 82 (56.6)                            | 51 (48.1)                        | 36 (23.5)                        |
| Moderate                                                             | 28 (19.3)                            | 26 (24.5)                        | 54 (35.3)                        |
| Low                                                                  | 35 (24.1)                            | 27 (25.5)                        | 61 (39.9)                        |
| Unknown                                                              | 0 (0.0)                              | 2 (1.9)                          | 2 (1.3)                          |
| Hospitalization status at first infection                            |                                      |                                  |                                  |
| Not hospitalized                                                     | 121 (83.4)                           | 101 (95.3)                       | 138 (90.2)                       |
| Hospitalized                                                         | 24 (16.6)                            | 5 (4.7)                          | 15 (9.8)                         |
| Months between infections among reinfected individuals, median (IQR) | 4.7 (3.6-6.2)                        | 5.3 (3.7-6.8)                    | 4.9 (3.6-6.6)                    |

Abbreviations: COVID-19, Coronavirus Disease 2019; RIDOH, Rhode Island Department of Health; IQR, Interquartile Range; CPVS, Completion of Primary Vaccination Series.

<sup>a</sup> Patient reported non-Hispanic or unknown ethnicity.

<sup>b</sup> Summary of symptom information reported to RIDOH as the reason for testing, during case investigation, and/or through symptom self-monitoring.

<sup>c</sup> ZIP-code-based community risk classification created by RIDOH based on community characteristics such as population density, sociodemographics, and COVID-19 burden to help guide COVID-19 surveillance and response efforts.

Note: for Table S2 we exclude information about first strain infection and vaccination status at reinfection. This is because 1) we exclude anybody before Dec 14 2020 so obviously there first strain was the wild type. Secondly, given they were excluded before vaccine rollout there vax status is unvaccinated and second infection strain is wild as well.

**eTable 8.**

Vaccine Effectiveness Associated With Protection Against COVID-19 Reinfection by Subpopulation, Stratified by Vaccine Type, Estimated Using a Cox Proportional Hazards Regression

|                              | <b>Vaccine effectiveness<br/>(95% CI)</b> |
|------------------------------|-------------------------------------------|
| <b>General population</b>    |                                           |
| Partial CPVS, Moderna/Pfizer | 52% (37%, 64%)                            |
| CPVS, Moderna/Pfizer         | 64% (58%, 69%)                            |
| CPVS, Janssen                | 48% (26%, 63%)                            |
| <b>LTCC employees</b>        |                                           |
| Partial CPVS, Moderna/Pfizer | 33% (-5%, 57%)                            |
| CPVS, Moderna/Pfizer         | 49% (26%, 65%)                            |
| CPVS, Janssen                | 57% (-211%, 94%)                          |
| <b>LTCC residents</b>        |                                           |
| Partial CPVS, Moderna/Pfizer | 55% (11%, 77%)                            |
| CPVS, Moderna/Pfizer         | 52% (26%, 68%)                            |
| CPVS, Janssen                | -68% (-415%, 45%)                         |

Abbreviations: CI, confidence interval; COVID-19, Coronavirus Disease 2019; LTCC, long-term congregate care; CPVS, Completion of Primary Vaccination Series.
